# Supplementary material for: Syntheses, spectroscopic, redox, and structural properties of homoleptic Iron(III/II) dithione complexes
Source: Royal Society of Chemistry journal article supplement (doi:10.1039/d0ra07371g), 2020-01-01
Supplement: d0ra07371g1.pdf [file d0ra07371g1.pdf]

## Supplementary Information

### **Syntheses, Spectroscopic, Redox, and Structural Properties of Homoleptic Iron(III/II) Dithione Complexes**

Kyle J. Colston,<sup>a</sup> Sara A. Dille,<sup>a</sup> Benjamin Mogesa,<sup>b</sup> Jacilynn Brant,<sup>c</sup> Victor N. Nemykin,<sup>d</sup> Matthias Zeller,<sup>e</sup> and Partha Basu<sup>\*a</sup>

a Department of Chemistry and Chemical Biology, Indiana University-Purdue University Indianapolis IN, 46202

b Department of Chemistry and Biochemistry, Duquesne University, Pittsburgh PA, 15282

c The Air Force Research Laboratory, Wright-Patterson AFB, OH, 45433

d Department of Chemistry, University of Tennessee, Knoxville TN, 37996

e Department of Chemistry, Purdue University, West Lafayette IN, 47907

\* Corresponding author: [basup@iupui.edu](mailto:basup@iupui.edu)

Refinement details for **[2]**[PF<sub>6</sub>]<sub>2</sub> and **[3]**[FeCl<sub>4</sub>][PF<sub>6</sub>]<sub>2</sub>

Methods for vibrating sample magnetometry of solid-state sample.

Figure S1. <sup>1</sup>H NMR spectrum of **[4]**[PF<sub>6</sub>]<sub>3</sub>.

Figure S2. <sup>1</sup>H NMR spectrum of **[3]**[PF<sub>6</sub>]<sub>3</sub>.

Figure S3. Inverse molar magnetic susceptibility of **[4]**[PF<sub>6</sub>]<sub>3</sub>.

Figure S4. Fe<sup>III/II</sup> based couples of **[1]**[PF<sub>6</sub>]<sub>2</sub>, **[2]**[PF<sub>6</sub>]<sub>2</sub>, **[3]**[PF<sub>6</sub>]<sub>3</sub>, and **[4]**[PF<sub>6</sub>]<sub>3</sub>.

Figure S5. Ligand-based couples and DPV of **[1]**[PF<sub>6</sub>]<sub>2</sub>.

Figure S6. Ligand-based couples at different scan rates and DPV of **[3]**[PF<sub>6</sub>]<sub>3</sub>.

Figure S7. EDDMs of **1**.

Figure S8. Molecular orbital diagram for **3**.

Table S1. Temperature dependent  $\delta_{para}$  for **[3]**[PF<sub>6</sub>]<sub>3</sub> and **[4]**[PF<sub>6</sub>]<sub>3</sub>.

Table S2. TD-DFT predicted excited states transitions of **1**.

Table S3. Electronic spectra for **1**, **[2]**[PF<sub>6</sub>]<sub>2</sub>, **[3]**[PF<sub>6</sub>]<sub>3</sub>, and **[4]**[PF<sub>6</sub>]<sub>3</sub>.

Table S4. Optimization energies of high and low spin states of **2** and **3**.

Table S5. Optimized coordinates of **1**.

Table S6. Optimized coordinates **3**.

Refinement details for **[2]**[PF<sub>6</sub>]<sub>2</sub> and **[3]**[FeCl<sub>4</sub>][PF<sub>6</sub>]<sub>2</sub>

All nonhydrogen atoms were refined anisotropically by full matrix least squares against F<sup>2</sup>. H atoms were positioned geometrically and constrained to ride on their parent atoms. C-H bond distances were constrained to 0.99 and 0.98 Å for CH<sub>2</sub> and CH<sub>3</sub> moieties, respectively. Methyl CH<sub>3</sub> were allowed to rotate but not to tip to best fit the experimental electron density. U<sub>iso</sub>(H) values were set to a multiple of U<sub>eq</sub>(C) with 1.5 for CH<sub>3</sub> and 1.2 for CH<sub>2</sub> units, respectively.

The crystal of **[2]**[PF<sub>6</sub>]<sub>2</sub> was found to be non-merohedrally twinned. The orientation matrices for the two components were identified using the program Cell\_Now, with the two components being related by a 180° rotation around the reciprocal axis (1 0 0). The two components were integrated using Saint and corrected for absorption using Twinabs. The structure was solved using direct methods with only the non-overlapping reflections of component 1. The structure was refined using the hklf 5 routine with all reflections of component 1 (including the overlapping ones), resulting in a BASF value of 0.1680(8).

One of the [PF<sub>6</sub>]<sup>-</sup> anions was found to be disordered by a rotation about the central atom. A two-fold disorder model was used for refinement. The major and minor moieties were restrained to have similar geometries (SAME restraint of Shelxl). For the minor moiety, the P-F distances were restrained to be similar. The ADPs of the major and minor P atoms and of F8 and F8B were each constrained to be identical. U<sup>ij</sup> components of atomic anisotropic displacement parameters (ADPs) for disordered atoms closer to each other than 2.0 Å were restrained to be similar. Subject to these conditions the occupancy ratios refined to 0.646(6) to 0.354(6).

In the structure of **[3]**[FeCl<sub>4</sub>][PF<sub>6</sub>]<sub>2</sub>, three of the six isopropyl groups were refined as disordered by a slight rotation around the C-N bond (C5, C6, C7; C8, C9, C10; and C25, C26, C27). The major and minor disordered moieties were each restrained to have similar geometries (SAME and SADI commands of Shelxl). U<sup>ij</sup> components of ADPs for the disordered atoms closer to each other less than 2.0 Å were restrained to be similar. Subject to these conditions, the occupancy ratios refined to 0.736(18) to 0.264(18), to 0.745(12) to 0.255(12), and to 0.58(3) to 0.42(3).

The two [PF<sub>6</sub>]<sup>-</sup> and the [FeCl<sub>4</sub>]<sup>-</sup> units were found to be disordered by a rotation about the central atom. A two-fold disorder model was used for all three anions. The [PF<sub>6</sub>]<sup>-</sup> anions were restrained to be

close to octahedral in shape by restraining all P-F bond distances and all cis-F•••F contacts to be similar in length for each [PF<sub>6</sub>]<sup>-</sup> anion. The [FeCl<sub>4</sub>]<sup>-</sup> anion moieties were restrained to be close to tetrahedral by restraining all Fe-Cl bond distances and all Cl•••Cl distances to be similar in length for both moieties. U<sup>ij</sup> components of ADPs for disordered atoms closer to each other than 2.0 Å were restrained to be similar. Subject to these conditions the occupancy ratios refined to 0.706(6) to 0.294(6) for the first [PF<sub>6</sub>]<sup>-</sup> anion, to 0.344(8) to 0.656(8) for the second [PF<sub>6</sub>]<sup>-</sup> anion, and to 0.413(12) to 0.587(12) for the [FeCl<sub>4</sub>]<sup>-</sup> anion.

#### Methods for vibrating sample magnetometry of solid-state sample

The raw data were converted to inverse molar magnetic susceptibility ( $\chi_M^{-1}$ ) and fit with Curie-Weiss law:  $\chi = C/(T - \theta)$  for  $T > 75\text{K}$  using  $1/\chi = 46.118 + 1.7964(T)$ .

Given the equation  $1/\chi = A + B \cdot T$ , the Weiss temperature ( $\theta$ ), the effective magnetic moment of Fe ( $\mu_{\text{Fe}}$ ) can be derived as follows

$$\theta = -A/B, C = 1/B, \mu_{\text{Fe}} = 2.828 \cdot \sqrt{C}$$

The results are  $\theta = -25.67$ ,  $C = 0.56$  emu K/mol Oe and  $\mu_{\text{Fe}} = 2.1 \mu_B$ . A negative value for  $\theta$  implies antiferromagnetic interactions dominate.

The magnetization data for  $H = 5$  kOe was converted to  $\chi_M^{-1}$  and fit to the same Curie-Weiss Law for all temperatures ( $T = 1.9\text{ K} - 300\text{ K}$ ) using  $1/\chi = 7.9187 + 2.5817(T)$ . The ( $\mu_{\text{Fe}}$ ) was derived using eqn. X with  $\theta = -3.07$ ,  $C = 0.39$  emu K/mol Oe and  $\mu_{\text{Fe}} = 1.8 \mu_B$ . The value for  $\theta$  is negative but smaller than what was observed at  $H = 1\text{ kOe}$  indicating weak antiferromagnetic interactions dominate the system. The  $\mu_{\text{Fe}}$  at both  $H = 1\text{ kOe}$  and  $5\text{ kOe}$  support low spin Fe(III).

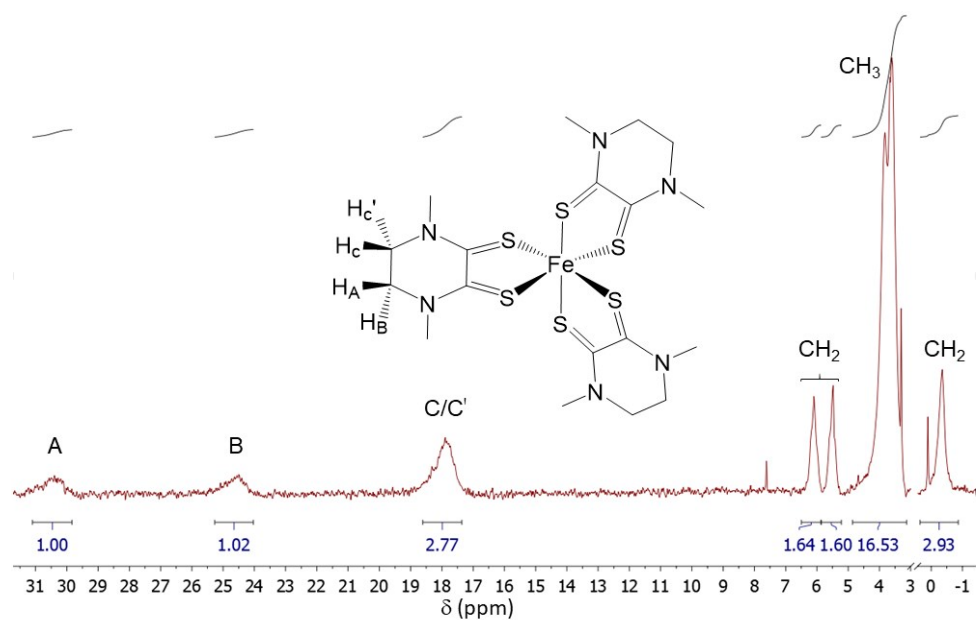

Figure S1.  $^1\text{H}$  NMR spectrum of  $[\mathbf{4}][\text{PF}_6]_3$  collected in CDCl<sub>3</sub> ( $\delta = 1.93$  ppm) at 296 K.

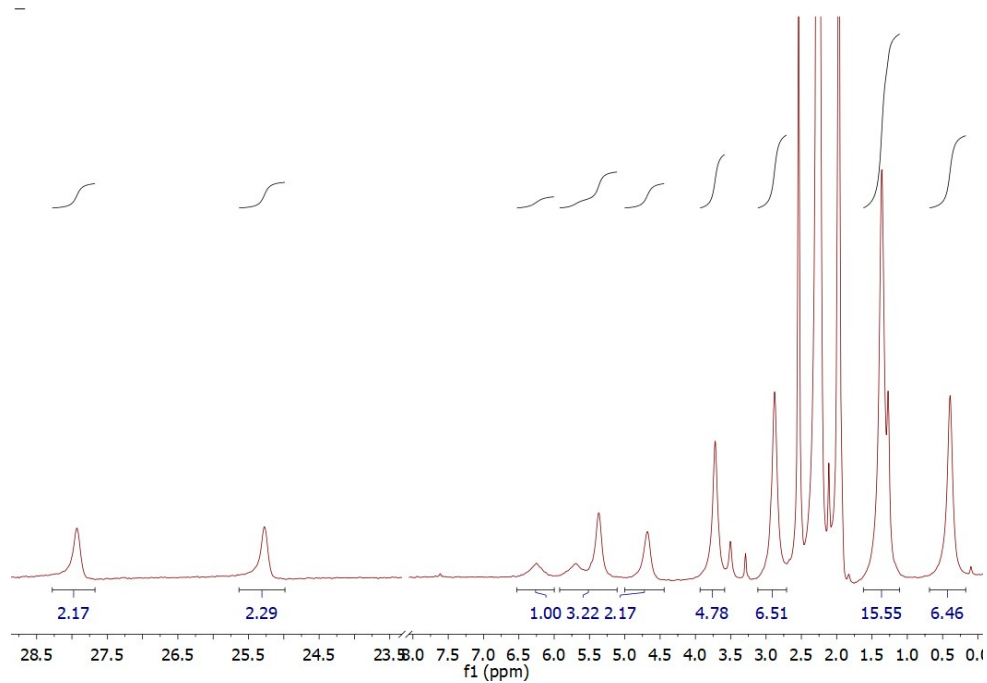

Figure S2.  $^1\text{H}$  NMR spectrum of  $[\mathbf{3}][\text{PF}_6]_3$  recorded as described in Figure S1.

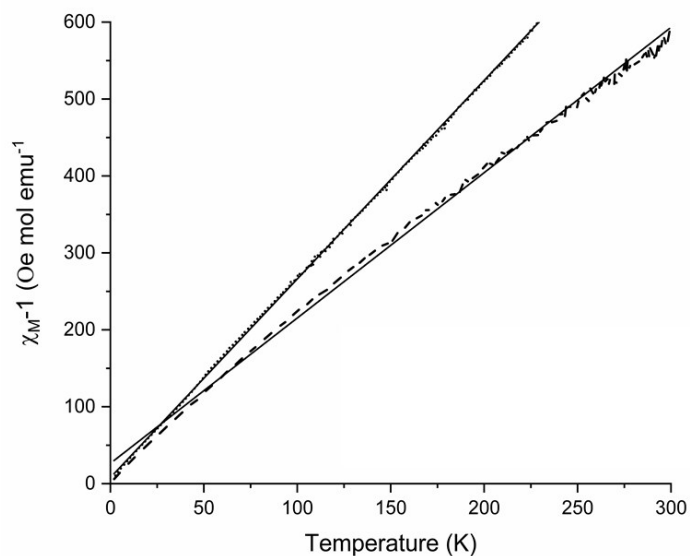

Figure S3. Inverse molar magnetic susceptibility of complex  $[4][PF_6]_3$  at 1kOe (dashed line) and 5kOe (dotted line) from 1.9K to 300K.

All electrochemical data presented below is recorded as described in Figure 3.

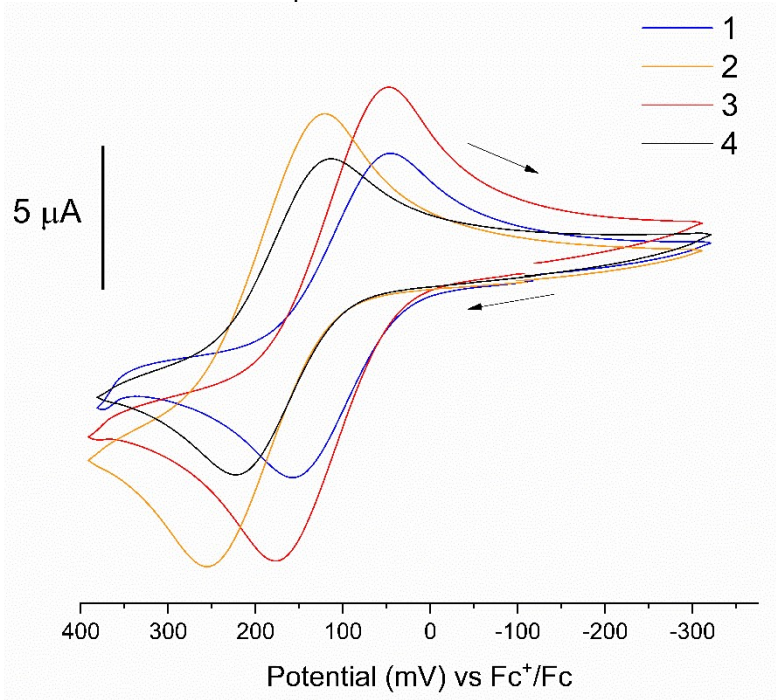

Figure S4.  $Fe^{III/II}$  based redox couples for  $[1][PF_6]_2$  (blue),  $[2][PF_6]_2$  (orange),  $[3][PF_6]_3$  (red), and  $[4][PF_6]_3$  (gray).

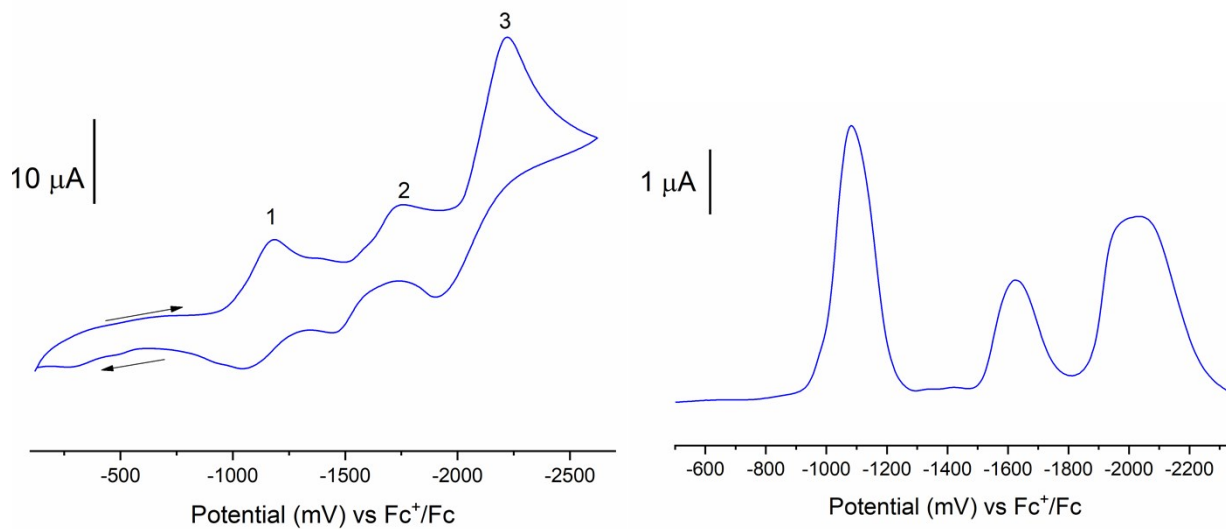

Figure S5. Ligand-based couples (left) and DPV (right) of **[1][PF<sub>6</sub>]<sub>2</sub>**.

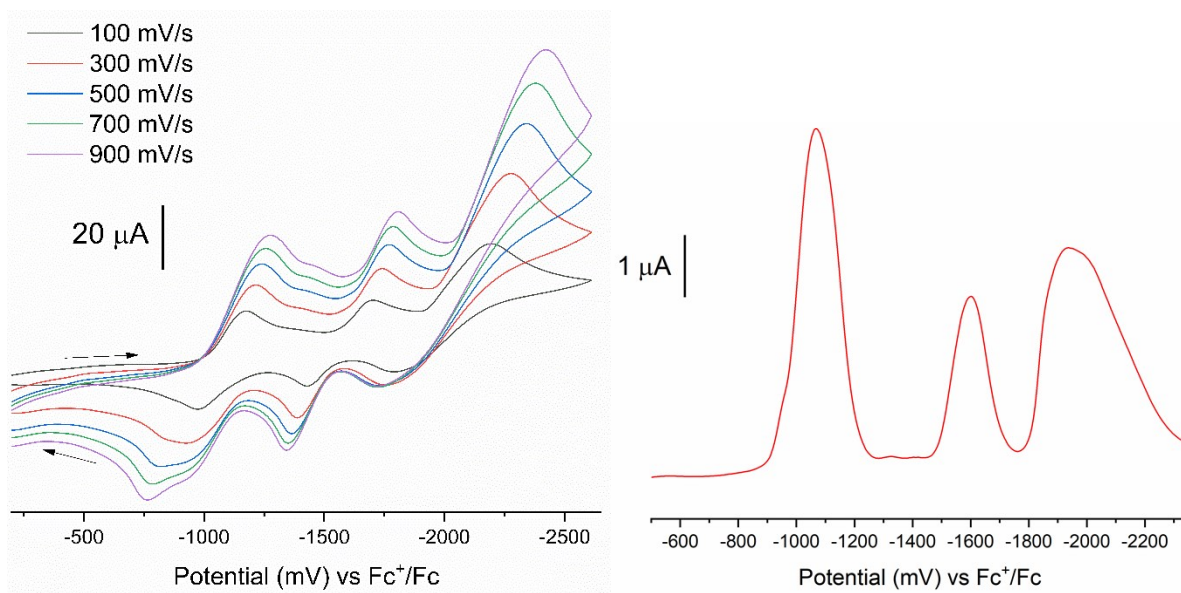

Figure S6. Ligand-based couples at different scan rates (left) and DPV (right) of **[3][PF<sub>6</sub>]<sub>3</sub>**.

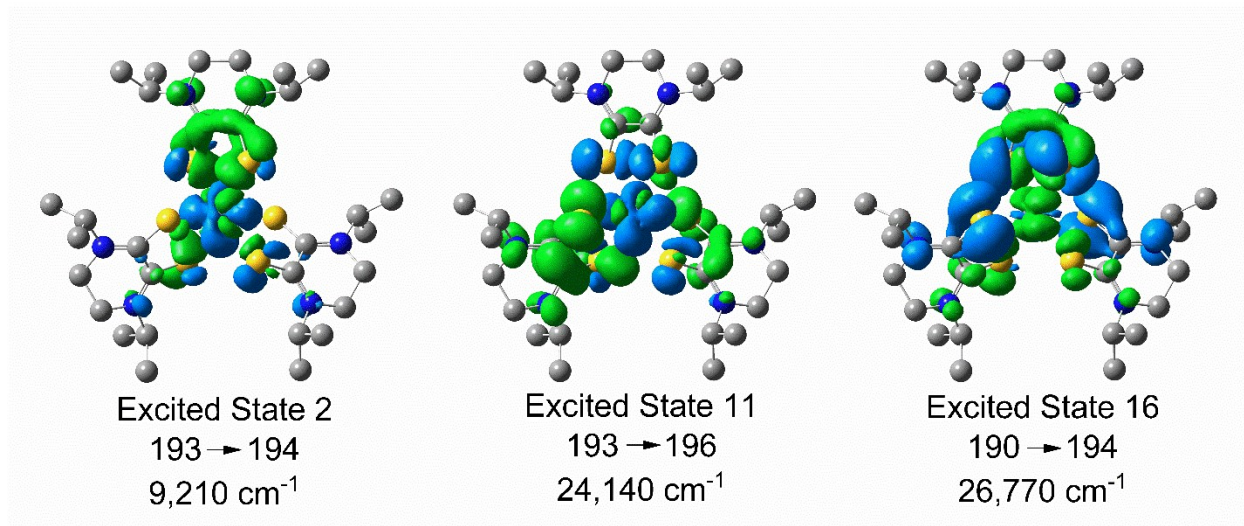

Figure S7. Electron density difference maps (EDDMs) of **1**. PCM-TD-DFT calculations for **1** were performed in acetonitrile using B3LYP with 6-311G\* for light atoms and the LANL2DZ effective core potential for Fe. Attempts to model the electronic spectra for **1** with full electron basis sets for Fe were unsatisfactory in both gas and solution phase calculations, and all attempts to model the electronic spectra of **3** were unsuccessful. Electron accepting orbitals are colored green while electron donating orbitals are blue. Transition energies and participating orbitals are included for each EDDM. TD-DFT output for each complex excited state is included in Table S2.

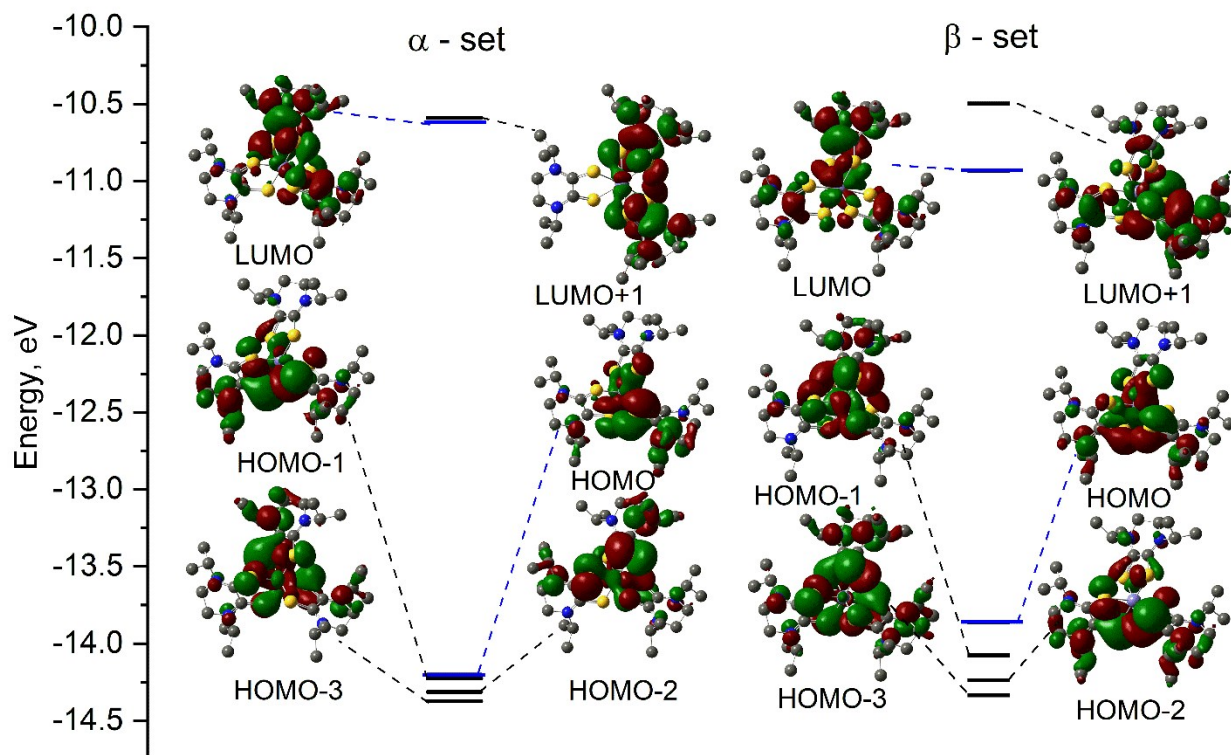

Figure S8. Frontier orbitals and energy diagrams of **3**. Energies are relative and each molecular orbital is paired with its corresponding energy on the diagram. HOMO and LUMO are highlighted blue for clarity.



Table S1.  $\delta_{\text{para}}$  shifts for **[3][PF<sub>6</sub>]<sub>3</sub>** and **[4][PF<sub>6</sub>]<sub>3</sub>** at various temperatures.

| <b>[4][PF<sub>6</sub>]<sub>3</sub></b> |                     |                     |                     |                     |                     |                     |                     |                     |  |  |
|----------------------------------------|---------------------|---------------------|---------------------|---------------------|---------------------|---------------------|---------------------|---------------------|--|--|
| T (K)                                  | H <sub>A</sub> (1H) | H <sub>B</sub> (1H) | H <sub>C</sub> (2H) | H <sub>D</sub> (2H) | H <sub>E</sub> (2H) | H <sub>F</sub> (9H) | H <sub>G</sub> (9H) | H <sub>H</sub> (4H) |  |  |
| 296                                    | 30.88               | 24.52               | 17.86               | 6.06                | 5.46                | 3.81                | 3.55                | -0.39               |  |  |
| 286                                    | 31.92               | 25.56               | 18.66               | 6.12                | 5.54                | 3.80                | 3.52                | -0.40               |  |  |
| 273                                    | 33.95               | 26.85               | 19.66               | 6.16                | 5.60                | 3.80                | 3.53                | -0.41               |  |  |
| 263                                    | 35.53               | 27.79               | 20.41               | 6.20                | 5.63                | 3.78                | 3.51                | -0.42               |  |  |
| 253                                    | 37.21               | 28.79               | 21.25               | 6.231               | 5.66                | 3.77                | 3.50                | -0.42               |  |  |
| 243                                    | 39.17               | 29.95               | 22.14               | 6.27                | 5.70                | 3.78                | 3.49                | -0.43               |  |  |

  

| <b>[3][PF<sub>6</sub>]<sub>3</sub></b> |                      |                      |                      |                      |                      |                      |                      |         |                       |                      |
|----------------------------------------|----------------------|----------------------|----------------------|----------------------|----------------------|----------------------|----------------------|---------|-----------------------|----------------------|
| T (K)                                  | CH <sub>2</sub> (2H) | CH <sub>2</sub> (2H) | CH <sub>2</sub> (1H) | CH <sub>2</sub> (1H) | CH <sub>2</sub> (2H) | CH <sub>2</sub> (2H) | CH <sub>2</sub> (2H) | CH (6H) | CH <sub>3</sub> (12H) | CH <sub>3</sub> (6H) |
| 296                                    | 26.70                | 24.17                | 6.15                 | 5.60                 | 5.34                 | 4.83                 | 3.72                 | 2.74    | 1.34                  | 0.45                 |
| 286                                    | 27.90                | 25.25                | 6.21                 | 5.66                 | 5.33                 | 4.64                 | 3.68                 | 2.84    | 1.32                  | 0.35                 |
| 273                                    | 29.53                | 26.67                | 6.31                 | 5.76                 | 5.35                 | 4.44                 | 3.69                 | 3.00    | 1.34                  | 0.26                 |
| 263                                    | 30.83                | 27.72                | 6.34                 | 5.79                 | 5.30                 | 4.23                 | 3.64                 | 3.06    | 1.30                  | 0.13                 |
| 253                                    | 32.28                | 28.92                | 6.40                 | 5.86                 | 5.29                 | 4.05                 | 3.63                 | 3.18    | 1.29                  | 0.03                 |
| 243                                    | 33.76                | 30.08                | 6.45                 | 5.93                 | 5.28                 | 3.87                 | 3.62                 | 3.27    | 1.27                  | -0.06                |

Table S2. TD-DFT calculated excited states for **1**.

Excited State 1: Singlet-A 1.1068 eV 1120.25 nm f=0.0004 <S\*\*2>=0.000  
 180 ->197 0.18776  
 181 ->198 -0.18484  
 192 ->194 -0.15289  
 192 ->198 -0.39899  
 193 ->195 0.15596  
 193 ->197 0.40655

This state for optimization and/or second-order correction.

Total Energy, E(TD-HF/TD-DFT) = -4017.06446100

Copying the excited state density for this state as the 1-particle RhoCl density.

Excited State 2: Singlet-A 1.1419 eV 1085.77 nm f=0.0000 <S\*\*2>=0.000  
 180 ->197 -0.12010  
 181 ->198 -0.12330  
 187 ->197 0.23442  
 191 ->195 0.13988  
 191 ->197 0.33114  
 191 ->198 0.12939  
 192 ->195 -0.11429  
 192 ->197 -0.24589  
 192 ->198 -0.17915  
 193 ->194 0.11361  
 193 ->197 -0.17206  
 193 ->198 0.24673

Excited State 3: Singlet-A 1.1425 eV 1085.22 nm f=0.0000 <S\*\*2>=0.000  
 180 ->198 0.12194  
 181 ->197 -0.12146  
 187 ->198 0.23473  
 191 ->194 0.13972  
 191 ->197 -0.13026  
 191 ->198 0.33103  
 192 ->194 0.11521  
 192 ->197 -0.17649  
 192 ->198 0.24964  
 193 ->195 0.11248  
 193 ->197 0.24214  
 193 ->198 0.17548

Excited State 4: Singlet-A 2.0414 eV 607.34 nm f=0.0000 <S\*\*2>=0.000  
 180 ->198 0.14802  
 181 ->197 0.14939  
 192 ->195 0.24490  
 192 ->197 0.38817  
 193 ->194 0.24444  
 193 ->198 0.38605

Excited State 5: Singlet-A 2.1144 eV 586.38 nm f=0.0002 <S\*\*2>=0.000  
 180 ->197 0.10640  
 181 ->198 0.10673  
 187 ->197 0.22698  
 191 ->194 -0.14651  
 191 ->195 0.18801  
 191 ->197 0.35974

|                   |           |           |           |          |              |
|-------------------|-----------|-----------|-----------|----------|--------------|
| 191 ->198         | -0.12646  |           |           |          |              |
| 192 ->194         | 0.10176   |           |           |          |              |
| 192 ->198         | 0.27856   |           |           |          |              |
| 193 ->195         | 0.10219   |           |           |          |              |
| 193 ->197         | 0.27800   |           |           |          |              |
| Excited State 6:  | Singlet-A | 2.1151 eV | 586.19 nm | f=0.0002 | <S**2>=0.000 |
| 180 ->198         | -0.10724  |           |           |          |              |
| 181 ->197         | 0.10593   |           |           |          |              |
| 187 ->198         | 0.22692   |           |           |          |              |
| 191 ->194         | 0.18816   |           |           |          |              |
| 191 ->195         | 0.14655   |           |           |          |              |
| 191 ->197         | 0.12711   |           |           |          |              |
| 191 ->198         | 0.36063   |           |           |          |              |
| 192 ->195         | 0.10054   |           |           |          |              |
| 192 ->197         | 0.27582   |           |           |          |              |
| 193 ->194         | -0.10272  |           |           |          |              |
| 193 ->198         | -0.27959  |           |           |          |              |
| Excited State 7:  | Singlet-A | 2.8249 eV | 438.89 nm | f=0.0034 | <S**2>=0.000 |
| 192 ->194         | 0.48754   |           |           |          |              |
| 192 ->198         | -0.16048  |           |           |          |              |
| 193 ->195         | -0.44048  |           |           |          |              |
| 193 ->197         | 0.14560   |           |           |          |              |
| Excited State 8:  | Singlet-A | 2.8492 eV | 435.16 nm | f=0.0184 | <S**2>=0.000 |
| 192 ->194         | 0.38427   |           |           |          |              |
| 192 ->195         | -0.22327  |           |           |          |              |
| 192 ->197         | 0.11476   |           |           |          |              |
| 192 ->198         | -0.10141  |           |           |          |              |
| 193 ->194         | 0.22208   |           |           |          |              |
| 193 ->195         | 0.42685   |           |           |          |              |
| 193 ->197         | -0.11508  |           |           |          |              |
| 193 ->198         | -0.11981  |           |           |          |              |
| Excited State 9:  | Singlet-A | 2.8497 eV | 435.08 nm | f=0.0192 | <S**2>=0.000 |
| 192 ->194         | -0.21216  |           |           |          |              |
| 192 ->195         | -0.40092  |           |           |          |              |
| 192 ->197         | 0.10690   |           |           |          |              |
| 192 ->198         | 0.11319   |           |           |          |              |
| 193 ->194         | 0.41153   |           |           |          |              |
| 193 ->195         | -0.23264  |           |           |          |              |
| 193 ->197         | 0.12162   |           |           |          |              |
| 193 ->198         | -0.11023  |           |           |          |              |
| Excited State 10: | Singlet-A | 2.9574 eV | 419.24 nm | f=0.0000 | <S**2>=0.000 |
| 192 ->195         | 0.41833   |           |           |          |              |
| 192 ->197         | -0.23136  |           |           |          |              |
| 193 ->194         | 0.41036   |           |           |          |              |
| 193 ->198         | -0.22812  |           |           |          |              |
| Excited State 11: | Singlet-A | 2.9931 eV | 414.23 nm | f=0.0205 | <S**2>=0.000 |
| 193 ->196         | 0.68536   |           |           |          |              |
| Excited State 12: | Singlet-A | 2.9938 eV | 414.13 nm | f=0.0211 | <S**2>=0.000 |
| 192 ->196         | 0.68493   |           |           |          |              |

Excited State 13: Singlet-A 3.0756 eV 403.13 nm f=0.0022 <S\*\*2>=0.000  
187 ->198 -0.13418  
191 ->194 0.63295  
191 ->198 -0.23799

Excited State 14: Singlet-A 3.0781 eV 402.80 nm f=0.0022 <S\*\*2>=0.000  
187 ->197 -0.13427  
191 ->195 0.63318  
191 ->197 -0.23822

Excited State 15: Singlet-A 3.2140 eV 385.77 nm f=0.0038 <S\*\*2>=0.000  
187 ->196 0.13154  
191 ->196 0.68812

Excited State 16: Singlet-A 3.3187 eV 373.59 nm f=0.1009 <S\*\*2>=0.000  
184 ->194 0.12208  
184 ->196 -0.14923  
185 ->194 -0.10028  
185 ->195 -0.11224  
186 ->194 0.25164  
188 ->195 -0.15387  
189 ->194 -0.18197  
189 ->195 0.11882  
190 ->194 0.50887

Excited State 17: Singlet-A 3.3207 eV 373.37 nm f=0.1009 <S\*\*2>=0.000  
184 ->195 -0.11730  
185 ->194 -0.11495  
185 ->196 -0.15164  
186 ->195 0.25234  
188 ->194 -0.16477  
188 ->195 0.16202  
189 ->194 0.12633  
189 ->195 0.15147  
190 ->195 0.49574

Excited State 18: Singlet-A 3.3751 eV 367.35 nm f=0.0001 <S\*\*2>=0.000  
184 ->194 -0.18813  
185 ->195 -0.19490  
186 ->196 0.17519  
188 ->194 0.16242  
188 ->195 -0.35905  
189 ->194 0.35982  
189 ->195 0.15967  
190 ->196 0.22942

Excited State 19: Singlet-A 3.3944 eV 365.26 nm f=0.0039 <S\*\*2>=0.000  
188 ->194 0.44564  
188 ->195 0.18270  
189 ->194 -0.21198  
189 ->195 0.44001

Excited State 20: Singlet-A 3.4216 eV 362.35 nm f=0.0819 <S\*\*2>=0.000  
188 ->195 0.42267  
189 ->194 0.41987

|                   |           |           |           |          |              |
|-------------------|-----------|-----------|-----------|----------|--------------|
| 190 ->194         | 0.23054   |           |           |          |              |
| 190 ->195         | -0.25258  |           |           |          |              |
| Excited State 21: | Singlet-A | 3.4225 eV | 362.26 nm | f=0.0824 | <S**2>=0.000 |
| 188 ->194         | 0.44737   |           |           |          |              |
| 189 ->195         | -0.44176  |           |           |          |              |
| 190 ->194         | 0.18494   |           |           |          |              |
| 190 ->195         | 0.19882   |           |           |          |              |
| Excited State 22: | Singlet-A | 3.5967 eV | 344.72 nm | f=0.0000 | <S**2>=0.000 |
| 184 ->194         | -0.18999  |           |           |          |              |
| 185 ->195         | -0.18664  |           |           |          |              |
| 186 ->196         | 0.24145   |           |           |          |              |
| 188 ->194         | -0.11711  |           |           |          |              |
| 188 ->195         | 0.26809   |           |           |          |              |
| 189 ->194         | -0.26530  |           |           |          |              |
| 189 ->195         | -0.11820  |           |           |          |              |
| 190 ->196         | 0.38414   |           |           |          |              |
| Excited State 23: | Singlet-A | 3.6379 eV | 340.81 nm | f=0.0782 | <S**2>=0.000 |
| 184 ->194         | 0.14874   |           |           |          |              |
| 184 ->195         | -0.16971  |           |           |          |              |
| 184 ->196         | -0.17209  |           |           |          |              |
| 185 ->194         | -0.17481  |           |           |          |              |
| 185 ->195         | -0.14370  |           |           |          |              |
| 186 ->194         | 0.23093   |           |           |          |              |
| 189 ->196         | 0.40774   |           |           |          |              |
| 190 ->194         | -0.31469  |           |           |          |              |
| Excited State 24: | Singlet-A | 3.6390 eV | 340.71 nm | f=0.0797 | <S**2>=0.000 |
| 184 ->194         | 0.16889   |           |           |          |              |
| 184 ->195         | 0.14235   |           |           |          |              |
| 185 ->194         | 0.14298   |           |           |          |              |
| 185 ->195         | -0.16872  |           |           |          |              |
| 185 ->196         | 0.17362   |           |           |          |              |
| 186 ->195         | -0.22934  |           |           |          |              |
| 187 ->194         | 0.10022   |           |           |          |              |
| 188 ->196         | 0.40991   |           |           |          |              |
| 190 ->195         | 0.30762   |           |           |          |              |
| Excited State 25: | Singlet-A | 3.6895 eV | 336.05 nm | f=0.0015 | <S**2>=0.000 |
| 184 ->195         | -0.10545  |           |           |          |              |
| 185 ->194         | -0.10608  |           |           |          |              |
| 186 ->195         | 0.11887   |           |           |          |              |
| 187 ->194         | 0.60682   |           |           |          |              |
| 188 ->196         | 0.13764   |           |           |          |              |
| 191 ->198         | -0.13115  |           |           |          |              |
| Excited State 26: | Singlet-A | 3.6907 eV | 335.93 nm | f=0.0019 | <S**2>=0.000 |
| 184 ->194         | -0.10684  |           |           |          |              |
| 185 ->195         | 0.10480   |           |           |          |              |
| 186 ->194         | -0.12017  |           |           |          |              |
| 187 ->195         | 0.60141   |           |           |          |              |
| 189 ->196         | 0.15752   |           |           |          |              |
| 191 ->197         | -0.13017  |           |           |          |              |

Excited State 27: Singlet-A 3.7425 eV 331.29 nm f=0.0032 <S\*\*2>=0.000  
184 ->195 0.15753  
185 ->194 0.16458  
186 ->194 -0.19680  
187 ->195 -0.25875  
189 ->196 0.51796  
190 ->194 0.11421

Excited State 28: Singlet-A 3.7439 eV 331.17 nm f=0.0033 <S\*\*2>=0.000  
184 ->194 -0.16982  
184 ->195 -0.10342  
185 ->194 -0.10089  
185 ->195 0.15442  
186 ->195 0.20194  
187 ->194 -0.24366  
188 ->196 0.51715  
190 ->195 -0.11194

Excited State 29: Singlet-A 3.7856 eV 327.51 nm f=0.0000 <S\*\*2>=0.000  
184 ->194 0.28972  
184 ->195 0.14155  
185 ->194 -0.14263  
185 ->195 0.30397  
190 ->196 0.50416

Excited State 30: Singlet-A 3.8015 eV 326.14 nm f=0.0002 <S\*\*2>=0.000  
184 ->194 0.20378  
184 ->195 -0.41363  
184 ->197 -0.14948  
185 ->194 0.42371  
185 ->195 0.20312  
185 ->198 0.15173

Excited State 31: Singlet-A 3.8481 eV 322.20 nm f=0.0851 <S\*\*2>=0.000  
184 ->194 -0.22983  
184 ->195 0.22072  
185 ->194 0.20773  
185 ->195 0.22381  
186 ->194 0.52348

Excited State 32: Singlet-A 3.8495 eV 322.08 nm f=0.0845 <S\*\*2>=0.000  
184 ->194 0.21436  
184 ->195 0.23365  
185 ->194 0.21993  
185 ->195 -0.22084  
186 ->195 0.52071

Excited State 33: Singlet-A 3.9497 eV 313.90 nm f=0.0100 <S\*\*2>=0.000  
182 ->194 -0.13235  
182 ->195 -0.11529  
183 ->194 0.11723  
183 ->195 -0.13266  
187 ->196 0.61321  
191 ->196 -0.11297

Excited State 34: Singlet-A 4.0437 eV 306.61 nm f=0.0059 <S\*\*2>=0.000

|                   |           |           |           |          |              |
|-------------------|-----------|-----------|-----------|----------|--------------|
| 180 ->195         | 0.11322   |           |           |          |              |
| 181 ->194         | -0.12087  |           |           |          |              |
| 182 ->194         | 0.31362   |           |           |          |              |
| 182 ->195         | 0.25929   |           |           |          |              |
| 183 ->194         | -0.28034  |           |           |          |              |
| 183 ->195         | 0.29989   |           |           |          |              |
| 187 ->196         | 0.29202   |           |           |          |              |
|                   |           |           |           |          |              |
| Excited State 35: | Singlet-A | 4.0619 eV | 305.24 nm | f=0.0025 | <S**2>=0.000 |
| 182 ->195         | 0.15891   |           |           |          |              |
| 183 ->194         | 0.15039   |           |           |          |              |
| 184 ->196         | 0.11335   |           |           |          |              |
| 185 ->196         | 0.57645   |           |           |          |              |
| 186 ->195         | 0.16469   |           |           |          |              |
|                   |           |           |           |          |              |
| Excited State 36: | Singlet-A | 4.0637 eV | 305.11 nm | f=0.0023 | <S**2>=0.000 |
| 182 ->194         | -0.16034  |           |           |          |              |
| 183 ->195         | 0.15652   |           |           |          |              |
| 183 ->196         | -0.10064  |           |           |          |              |
| 184 ->196         | 0.57539   |           |           |          |              |
| 185 ->196         | -0.11563  |           |           |          |              |
| 186 ->194         | 0.16017   |           |           |          |              |
|                   |           |           |           |          |              |
| Excited State 37: | Singlet-A | 4.0788 eV | 303.97 nm | f=0.0000 | <S**2>=0.000 |
| 184 ->194         | 0.16698   |           |           |          |              |
| 185 ->195         | 0.15944   |           |           |          |              |
| 186 ->196         | 0.59964   |           |           |          |              |
| 188 ->197         | 0.11082   |           |           |          |              |
| 189 ->198         | -0.11662  |           |           |          |              |
| 190 ->196         | -0.13906  |           |           |          |              |
|                   |           |           |           |          |              |
| Excited State 38: | Singlet-A | 4.0930 eV | 302.91 nm | f=0.0160 | <S**2>=0.000 |
| 179 ->194         | -0.12461  |           |           |          |              |
| 182 ->194         | -0.19994  |           |           |          |              |
| 182 ->195         | 0.30278   |           |           |          |              |
| 182 ->196         | 0.20231   |           |           |          |              |
| 183 ->194         | 0.29220   |           |           |          |              |
| 183 ->195         | 0.21626   |           |           |          |              |
| 183 ->196         | -0.16785  |           |           |          |              |
| 184 ->196         | -0.11150  |           |           |          |              |
| 185 ->196         | -0.23325  |           |           |          |              |
|                   |           |           |           |          |              |
| Excited State 39: | Singlet-A | 4.0948 eV | 302.78 nm | f=0.0160 | <S**2>=0.000 |
| 179 ->195         | 0.12434   |           |           |          |              |
| 182 ->194         | -0.29456  |           |           |          |              |
| 182 ->195         | -0.20758  |           |           |          |              |
| 182 ->196         | -0.17085  |           |           |          |              |
| 183 ->194         | -0.21053  |           |           |          |              |
| 183 ->195         | 0.29534   |           |           |          |              |
| 183 ->196         | -0.20525  |           |           |          |              |
| 184 ->196         | -0.23696  |           |           |          |              |
| 185 ->196         | 0.10493   |           |           |          |              |
|                   |           |           |           |          |              |
| Excited State 40: | Singlet-A | 4.1564 eV | 298.30 nm | f=0.0214 | <S**2>=0.000 |
| 188 ->197         | 0.43519   |           |           |          |              |
| 189 ->198         | 0.47365   |           |           |          |              |

|                   |           |           |           |          |              |  |
|-------------------|-----------|-----------|-----------|----------|--------------|--|
|                   | 190 ->197 | -0.16028  |           |          |              |  |
| Excited State 41: | Singlet-A | 4.1565 eV | 298.29 nm | f=0.0225 | <S**2>=0.000 |  |
|                   | 188 ->198 | -0.44100  |           |          |              |  |
|                   | 189 ->197 | 0.49117   |           |          |              |  |
| Excited State 42: | Singlet-A | 4.1616 eV | 297.92 nm | f=0.0000 | <S**2>=0.000 |  |
|                   | 186 ->196 | -0.15381  |           |          |              |  |
|                   | 188 ->197 | 0.47028   |           |          |              |  |
|                   | 189 ->198 | -0.44740  |           |          |              |  |
| Excited State 43: | Singlet-A | 4.1671 eV | 297.53 nm | f=0.0086 | <S**2>=0.000 |  |
|                   | 188 ->198 | 0.47319   |           |          |              |  |
|                   | 189 ->197 | 0.41428   |           |          |              |  |
|                   | 192 ->198 | 0.11080   |           |          |              |  |
|                   | 193 ->197 | -0.10088  |           |          |              |  |
| Excited State 44: | Singlet-A | 4.2047 eV | 294.87 nm | f=0.0830 | <S**2>=0.000 |  |
|                   | 190 ->197 | 0.35928   |           |          |              |  |
|                   | 190 ->198 | 0.54019   |           |          |              |  |
| Excited State 45: | Singlet-A | 4.2048 eV | 294.86 nm | f=0.0845 | <S**2>=0.000 |  |
|                   | 188 ->197 | 0.13530   |           |          |              |  |
|                   | 190 ->197 | 0.52287   |           |          |              |  |
|                   | 190 ->198 | -0.35935  |           |          |              |  |
| Excited State 46: | Singlet-A | 4.2800 eV | 289.68 nm | f=0.0000 | <S**2>=0.000 |  |
|                   | 180 ->194 | 0.17144   |           |          |              |  |
|                   | 180 ->195 | 0.10770   |           |          |              |  |
|                   | 181 ->194 | -0.10966  |           |          |              |  |
|                   | 181 ->195 | 0.17170   |           |          |              |  |
|                   | 182 ->194 | 0.27559   |           |          |              |  |
|                   | 182 ->195 | -0.31065  |           |          |              |  |
|                   | 183 ->194 | 0.31373   |           |          |              |  |
|                   | 183 ->195 | 0.27416   |           |          |              |  |
|                   | 186 ->196 | -0.12090  |           |          |              |  |
| Excited State 47: | Singlet-A | 4.3116 eV | 287.56 nm | f=0.0042 | <S**2>=0.000 |  |
|                   | 187 ->195 | -0.12053  |           |          |              |  |
|                   | 187 ->197 | 0.55260   |           |          |              |  |
|                   | 187 ->198 | 0.13190   |           |          |              |  |
|                   | 191 ->197 | -0.33731  |           |          |              |  |
| Excited State 48: | Singlet-A | 4.3118 eV | 287.54 nm | f=0.0042 | <S**2>=0.000 |  |
|                   | 187 ->194 | -0.11995  |           |          |              |  |
|                   | 187 ->197 | -0.13177  |           |          |              |  |
|                   | 187 ->198 | 0.55331   |           |          |              |  |
|                   | 191 ->198 | -0.33817  |           |          |              |  |
| Excited State 49: | Singlet-A | 4.3221 eV | 286.86 nm | f=0.0055 | <S**2>=0.000 |  |
|                   | 184 ->195 | -0.13553  |           |          |              |  |
|                   | 184 ->197 | 0.45133   |           |          |              |  |
|                   | 185 ->194 | 0.13351   |           |          |              |  |
|                   | 185 ->198 | -0.45107  |           |          |              |  |
| Excited State 50: | Singlet-A | 4.4334 eV | 279.66 nm | f=0.0006 | <S**2>=0.000 |  |



|           |          |
|-----------|----------|
| 180 ->194 | 0.33179  |
| 180 ->195 | 0.16698  |
| 181 ->194 | -0.26073 |
| 181 ->195 | 0.33859  |
| 182 ->194 | -0.16867 |
| 182 ->195 | 0.17548  |
| 183 ->194 | -0.17852 |
| 183 ->195 | -0.14274 |
| 191 ->199 | -0.11223 |

Excited State 51: Singlet-A 4.4418 eV 279.13 nm f=0.0339 <S\*\*2>=0.000

|           |          |
|-----------|----------|
| 180 ->195 | 0.40928  |
| 181 ->194 | 0.40408  |
| 181 ->195 | 0.15588  |
| 183 ->196 | 0.18057  |
| 186 ->198 | 0.13130  |
| 190 ->198 | -0.15658 |

Excited State 52: Singlet-A 4.4422 eV 279.11 nm f=0.0362 <S\*\*2>=0.000

|           |          |
|-----------|----------|
| 180 ->194 | 0.43131  |
| 180 ->195 | 0.11348  |
| 181 ->194 | 0.10987  |
| 181 ->195 | -0.39366 |
| 182 ->196 | -0.16304 |
| 186 ->197 | 0.13221  |
| 190 ->197 | -0.14873 |

Excited State 53: Singlet-A 4.4540 eV 278.37 nm f=0.0751 <S\*\*2>=0.000

|           |          |
|-----------|----------|
| 182 ->194 | -0.20362 |
| 182 ->195 | -0.10969 |
| 182 ->196 | 0.24703  |
| 183 ->195 | 0.20867  |
| 183 ->196 | 0.42224  |
| 184 ->197 | 0.19251  |
| 185 ->198 | 0.18836  |

Excited State 54: Singlet-A 4.4556 eV 278.27 nm f=0.0753 <S\*\*2>=0.000

|           |          |
|-----------|----------|
| 182 ->194 | 0.10199  |
| 182 ->195 | -0.20074 |
| 182 ->196 | 0.42457  |
| 183 ->194 | -0.19935 |
| 183 ->196 | -0.24708 |
| 184 ->198 | -0.19763 |
| 185 ->197 | 0.20079  |

Excited State 55: Singlet-A 4.4675 eV 277.52 nm f=0.0060 <S\*\*2>=0.000

|           |          |
|-----------|----------|
| 180 ->194 | -0.24064 |
| 180 ->195 | 0.41228  |
| 181 ->194 | -0.35947 |
| 181 ->195 | -0.24470 |
| 183 ->195 | -0.11588 |

Excited State 56: Singlet-A 4.4940 eV 275.89 nm f=0.0518 <S\*\*2>=0.000

|           |          |
|-----------|----------|
| 180 ->196 | -0.25134 |
| 182 ->196 | -0.10940 |
| 183 ->196 | -0.19532 |

184 ->197 0.35803  
184 ->198 -0.14104  
185 ->197 0.14009  
185 ->198 0.35632  
192 ->199 -0.12736

Excited State 57: Singlet-A 4.4942 eV 275.87 nm f=0.0511 <S\*\*2>=0.000

181 ->196 0.25655  
182 ->196 -0.20633  
183 ->196 0.11587  
184 ->197 -0.13954  
184 ->198 -0.35214  
185 ->197 0.35434  
185 ->198 -0.13877  
193 ->199 -0.12484

Excited State 58: Singlet-A 4.5804 eV 270.69 nm f=0.0929 <S\*\*2>=0.000

181 ->196 0.14944  
186 ->197 0.64562

Excited State 59: Singlet-A 4.5813 eV 270.63 nm f=0.0942 <S\*\*2>=0.000

180 ->196 0.15122  
186 ->198 0.64469

Excited State 60: Singlet-A 4.6573 eV 266.22 nm f=0.0035 <S\*\*2>=0.000

181 ->196 0.16726  
192 ->199 0.22577  
193 ->199 0.61639

Table S3: Electronic spectral data of dithiolene complexes.

| Compound                                   | $\lambda_{\max}$ , nm( $\epsilon$ , M <sup>-1</sup> cm <sup>-1</sup> )               | Ref. |
|--------------------------------------------|--------------------------------------------------------------------------------------|------|
| [Fe(IV)(mnt) <sub>3</sub> ] <sup>2-</sup>  | 806(3,300), 609(1,100), 404(8,000), 247(75,000)                                      | 1    |
| [Fe(III)(mnt) <sub>3</sub> ] <sup>3-</sup> | 990(700), 714(1,100), 602(sh, 1,200), 363(37,000), 250(84,000)                       | 1    |
| <b>[1]</b> [PF <sub>6</sub> ] <sub>2</sub> | 923(4,040); 805(3,960); 593 (sh, 7,500); 362 (sh, 15 510); 305 (19 410); 218(33 550) |      |
| <b>[2]</b> [PF <sub>6</sub> ] <sub>2</sub> | 887 (3,380); 779 (3,280); 349 (13 310); 292 (23 270); 216 (37 050)                   |      |
| <b>[3]</b> [PF <sub>6</sub> ] <sub>3</sub> | 657 (sh, 3,790); 537 (sh, 4,920); 353 (27 620); 292 (29 010); 228 (33 530)           |      |
| <b>[4]</b> [PF <sub>6</sub> ] <sub>3</sub> | 882 (4,550); 529 (3,470); 342 (28 900); 281(35 460) 215 (44 030)                     |      |

Table S4. Optimization energies (eV) for **3** and **2**

| Spin      | Energy (eV)      |                          |
|-----------|------------------|--------------------------|
|           | <b>3</b>         | <b>2</b>                 |
| HS(S=5/2) | -140303.29442758 | HS(S=2) -127485.38134359 |
| IS(S=3/2) | -140303.80485436 | IS(S=1) -127486.29726489 |
| LS(S=1/2) | -140304.71820637 | LS(S=0) -127487.32960766 |

Table S5. Optimized coordinates of 1.

|    |           |           |           |
|----|-----------|-----------|-----------|
| Fe | 0.000000  | -0.000000 | -0.000000 |
| S  | 1.926000  | 0.846000  | -1.402000 |
| S  | -1.754000 | -1.160000 | 1.401000  |
| S  | 1.882000  | -0.939000 | 1.401000  |
| S  | -0.229000 | -2.091000 | -1.401000 |
| S  | -0.127000 | 2.099000  | 1.401000  |
| S  | -1.695000 | 1.244000  | -1.402000 |
| C  | -1.073000 | 3.174000  | 0.503000  |
| C  | -2.036000 | 5.304000  | -0.013000 |
| H  | -1.735000 | 5.534000  | -1.028000 |
| H  | -2.121000 | 6.227000  | 0.535000  |
| C  | -3.358000 | 4.582000  | 0.014000  |
| H  | -3.715000 | 4.453000  | 1.029000  |
| H  | -4.089000 | 5.153000  | -0.534000 |
| C  | -2.088000 | 2.620000  | -0.504000 |
| C  | -0.002000 | 5.165000  | 1.481000  |
| H  | 0.770000  | 4.435000  | 1.651000  |
| C  | -5.660000 | 2.915000  | -0.719000 |
| H  | -5.601000 | 2.431000  | 0.250000  |
| H  | -6.432000 | 2.417000  | -1.294000 |
| H  | -5.981000 | 3.940000  | -0.577000 |
| C  | -4.341000 | 2.796000  | -1.481000 |
| H  | -4.146000 | 1.753000  | -1.651000 |
| C  | 0.612000  | 6.338000  | 0.719000  |
| H  | -0.077000 | 7.162000  | 0.577000  |
| H  | 0.987000  | 6.027000  | -0.250000 |
| H  | 1.448000  | 6.718000  | 1.294000  |

|   |           |           |           |
|---|-----------|-----------|-----------|
| N | -1.023000 | 4.471000  | 0.639000  |
| N | -3.206000 | 3.280000  | -0.638000 |
| C | 3.314000  | 0.498000  | -0.504000 |
| C | 4.474000  | -2.580000 | 1.482000  |
| H | 3.456000  | -2.884000 | 1.652000  |
| C | 5.648000  | 0.616000  | 0.013000  |
| H | 6.508000  | 0.963000  | -0.535000 |
| H | 5.714000  | 0.990000  | 1.028000  |
| C | 3.286000  | -0.658000 | 0.504000  |
| C | 5.612000  | -0.889000 | -0.013000 |
| H | 6.454000  | -1.277000 | 0.535000  |
| H | 5.660000  | -1.266000 | -1.028000 |
| C | 4.593000  | 2.361000  | -1.482000 |
| H | 3.592000  | 2.713000  | -1.652000 |
| C | 5.119000  | -2.257000 | 2.828000  |
| H | 6.151000  | -1.940000 | 2.721000  |
| H | 5.116000  | -3.146000 | 3.447000  |
| H | 4.567000  | -1.484000 | 3.348000  |
| N | 4.444000  | 1.136000  | -0.639000 |
| N | 4.384000  | -1.350000 | 0.639000  |
| N | -1.238000 | -4.416000 | -0.638000 |
| N | -3.361000 | -3.120000 | 0.639000  |
| C | -1.225000 | -3.118000 | -0.503000 |
| C | -2.291000 | -5.199000 | 0.013000  |
| H | -2.420000 | -6.117000 | -0.534000 |
| H | -2.001000 | -5.443000 | 1.028000  |
| C | -3.576000 | -4.414000 | -0.013000 |
| H | -3.926000 | -4.268000 | -1.028000 |

|   |           |           |           |
|---|-----------|-----------|-----------|
| H | -4.334000 | -4.949000 | 0.535000  |
| C | -2.213000 | -2.516000 | 0.504000  |
| C | -4.472000 | -2.583000 | 1.481000  |
| H | -4.226000 | -1.550000 | 1.651000  |
| C | -5.795000 | -2.637000 | 0.719000  |
| H | -6.165000 | -3.646000 | 0.577000  |
| H | -5.713000 | -2.157000 | -0.250000 |
| H | -6.541000 | -2.103000 | 1.294000  |
| C | -0.252000 | -5.158000 | -1.481000 |
| H | 0.554000  | -4.468000 | -1.651000 |
| C | 5.183000  | -3.699000 | 0.721000  |
| H | 4.726000  | -3.869000 | -0.248000 |
| H | 5.093000  | -4.613000 | 1.296000  |
| H | 6.241000  | -3.515000 | 0.579000  |
| C | 5.356000  | 3.444000  | -0.720000 |
| H | 4.907000  | 3.635000  | 0.248000  |
| H | 5.311000  | 4.360000  | -1.296000 |
| H | 6.404000  | 3.209000  | -0.578000 |
| C | -4.350000 | 3.518000  | -2.826000 |
| H | -4.540000 | 4.581000  | -2.720000 |
| H | -5.140000 | 3.108000  | -3.446000 |
| H | -3.410000 | 3.381000  | -3.347000 |
| C | 5.223000  | 2.007000  | -2.827000 |
| H | 6.239000  | 1.640000  | -2.720000 |
| H | 5.263000  | 2.895000  | -3.447000 |
| H | 4.634000  | 1.261000  | -3.347000 |
| C | -0.604000 | 5.562000  | 2.827000  |
| H | 0.167000  | 6.004000  | 3.446000  |

|   |           |           |           |
|---|-----------|-----------|-----------|
| H | -0.998000 | 4.698000  | 3.347000  |
| H | -1.395000 | 6.298000  | 2.720000  |
| C | -0.873000 | -5.527000 | -2.826000 |
| H | -0.124000 | -6.006000 | -3.446000 |
| H | -1.224000 | -4.644000 | -3.347000 |
| H | -1.699000 | -6.222000 | -2.720000 |
| C | 0.304000  | -6.360000 | -0.719000 |
| H | -0.424000 | -7.150000 | -0.577000 |
| H | 0.694000  | -6.067000 | 0.250000  |
| H | 1.120000  | -6.780000 | -1.294000 |
| C | -4.516000 | -3.303000 | 2.827000  |
| H | -4.757000 | -4.356000 | 2.720000  |
| H | -5.284000 | -2.856000 | 3.446000  |
| H | -3.570000 | -3.212000 | 3.347000  |

Table S6. Optimized coordinates for **3**.

|    |           |           |           |
|----|-----------|-----------|-----------|
| Fe | 0.021000  | -0.250000 | -0.146000 |
| S  | -0.942000 | 1.400000  | -1.355000 |
| S  | 1.048000  | -1.833000 | 1.110000  |
| S  | 1.152000  | 1.299000  | 1.027000  |
| S  | 1.672000  | -0.491000 | -1.668000 |
| S  | -1.614000 | -0.220000 | 1.410000  |
| S  | -1.224000 | -1.743000 | -1.303000 |
| C  | -2.900000 | -1.075000 | 0.748000  |
| C  | -5.217000 | -1.738000 | 0.590000  |
| H  | -5.583000 | -1.273000 | -0.178000 |
| H  | -5.927000 | -1.862000 | 1.238000  |
| C  | -4.684000 | -3.064000 | 0.167000  |
| H  | -4.421000 | -3.574000 | 0.949000  |
| H  | -5.376000 | -3.560000 | -0.298000 |
| C  | -2.636000 | -1.968000 | -0.422000 |
| C  | -4.516000 | 0.161000  | 2.129000  |
| H  | -3.702000 | 0.517000  | 2.542000  |
| C  | -3.603000 | -5.241000 | -1.491000 |
| H  | -3.127000 | -5.436000 | -0.680000 |
| H  | -3.291000 | -5.819000 | -2.191000 |
| H  | -4.542000 | -5.383000 | -1.353000 |
| C  | -3.359000 | -3.776000 | -1.889000 |
| H  | -2.428000 | -3.704000 | -2.190000 |
| C  | -5.148000 | 1.232000  | 1.313000  |
| H  | -5.966000 | 0.905000  | 0.932000  |
| H  | -4.550000 | 1.494000  | 0.608000  |
| H  | -5.335000 | 1.991000  | 1.870000  |



|   |           |           |           |
|---|-----------|-----------|-----------|
| N | -4.134000 | -0.944000 | 1.184000  |
| N | -3.520000 | -2.887000 | -0.723000 |
| C | -0.537000 | 2.821000  | -0.518000 |
| C | 2.496000  | 3.947000  | 1.514000  |
| H | 2.799000  | 3.019000  | 1.610000  |
| C | -0.795000 | 5.118000  | 0.139000  |
| H | -1.138000 | 5.921000  | -0.284000 |
| H | -1.166000 | 5.064000  | 1.033000  |
| C | 0.628000  | 2.788000  | 0.420000  |
| C | 0.669000  | 5.185000  | 0.214000  |
| H | 0.930000  | 5.909000  | 0.804000  |
| H | 1.030000  | 5.371000  | -0.667000 |
| C | -2.414000 | 4.049000  | -1.505000 |
| H | -2.660000 | 3.153000  | -1.817000 |
| C | 2.282000  | 4.478000  | 2.874000  |
| H | 1.918000  | 5.365000  | 2.818000  |
| H | 3.118000  | 4.505000  | 3.344000  |
| H | 1.667000  | 3.911000  | 3.347000  |
| N | -1.201000 | 3.932000  | -0.642000 |
| N | 1.226000  | 3.919000  | 0.716000  |
| N | 4.183000  | -0.964000 | -1.005000 |
| N | 3.419000  | -2.933000 | 0.822000  |
| C | 2.928000  | -1.167000 | -0.761000 |
| C | 5.219000  | -1.697000 | -0.195000 |
| H | 6.045000  | -1.771000 | -0.699000 |
| H | 5.404000  | -1.212000 | 0.625000  |
| C | 4.699000  | -3.042000 | 0.121000  |
| H | 4.579000  | -3.546000 | -0.699000 |

|   |           |           |           |
|---|-----------|-----------|-----------|
| H | 5.336000  | -3.516000 | 0.677000  |
| C | 2.555000  | -2.049000 | 0.409000  |
| C | 3.139000  | -3.850000 | 1.957000  |
| H | 2.222000  | -3.682000 | 2.258000  |
| C | 3.213000  | -5.310000 | 1.474000  |
| H | 4.069000  | -5.471000 | 1.070000  |
| H | 2.519000  | -5.469000 | 0.829000  |
| H | 3.096000  | -5.901000 | 2.222000  |
| C | 4.663000  | 0.059000  | -2.006000 |
| H | 3.872000  | 0.424000  | -2.457000 |
| C | 3.568000  | 4.690000  | 0.786000  |
| H | 3.608000  | 4.384000  | -0.124000 |
| H | 4.414000  | 4.532000  | 1.213000  |
| H | 3.373000  | 5.629000  | 0.799000  |
| C | -3.567000 | 4.611000  | -0.714000 |
| H | -3.373000 | 4.548000  | 0.224000  |
| H | -4.364000 | 4.112000  | -0.910000 |
| H | -3.700000 | 5.532000  | -0.952000 |
| C | -4.224000 | -3.358000 | -3.011000 |
| H | -5.139000 | -3.344000 | -2.720000 |
| H | -4.129000 | -3.979000 | -3.737000 |
| H | -3.967000 | -2.481000 | -3.303000 |
| C | -2.075000 | 4.893000  | -2.709000 |
| H | -1.371000 | 5.506000  | -2.482000 |
| H | -2.851000 | 5.387000  | -2.983000 |
| H | -1.786000 | 4.326000  | -3.428000 |
| C | -5.408000 | -0.317000 | 3.188000  |
| H | -5.469000 | 0.347000  | 3.880000  |

|   |           |           |           |
|---|-----------|-----------|-----------|
| H | -5.062000 | -1.132000 | 3.556000  |
| H | -6.282000 | -0.476000 | 2.822000  |
| C | 5.480000  | -0.576000 | -3.013000 |
| H | 5.796000  | 0.085000  | -3.633000 |
| H | 4.958000  | -1.231000 | -3.483000 |
| H | 6.229000  | -1.006000 | -2.593000 |
| C | 5.307000  | 1.163000  | -1.284000 |
| H | 6.030000  | 0.819000  | -0.754000 |
| H | 4.665000  | 1.589000  | -0.712000 |
| H | 5.648000  | 1.802000  | -1.914000 |
| C | 4.044000  | -3.584000 | 3.098000  |
| H | 4.955000  | -3.698000 | 2.817000  |
| H | 3.850000  | -4.196000 | 3.811000  |
| H | 3.914000  | -2.684000 | 3.405000  |

1. Best, S. P.; Clark, R. J. H.; McQueen, R. C. S.; Walton, J. R., Spectroelectrochemical (electronic and FTIR) studies of trismaleonitriledithiolate) complexes. *Inorg. Chem.* **1988**, 27 (5), 884-90.
